# Supplementary material for: Quercetin Directly Targets JAK2 and PKCδ and Prevents UV-Induced Photoaging in Human Skin
Source: Int J Mol Sci. 2019 Oct 23;20(21):5262. doi: 10.3390/ijms20215262 (PMC6862686; doi:10.3390/ijms20215262)
Supplement: Supplementary file 1 [file ijms-20-05262-s001.pdf]

## Supplementary figure

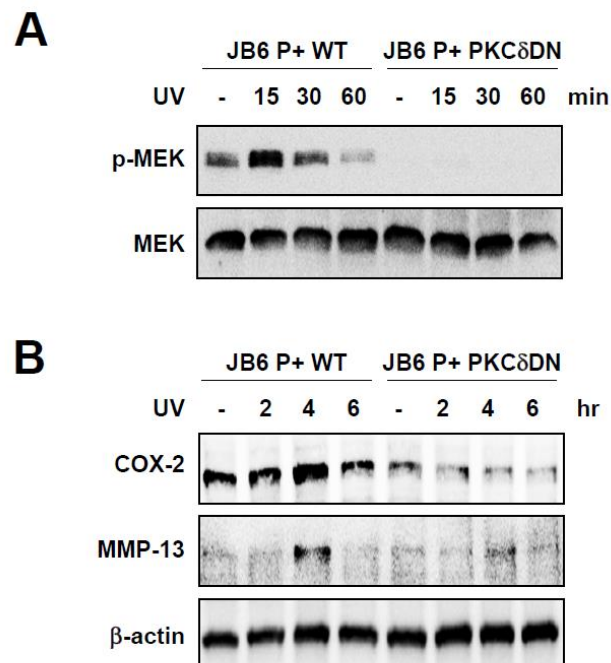

**Figure S1.** (A) Phosphorylation of MEK is reduced in PKC $\delta$ DN cells. Phospho-MEK level was determined to confirm reduced activity of PKC $\delta$  (B) UV-induced COX-2 and MMP-13 expression levels are suppressed in PKC $\delta$ DN cells. Mouse MMP-13 was used as a functional homologue of human MMP-1.
